## Percutaneous coronary intervention during on- and off-hours in patients with ST-segment elevation myocardial infarction

T. Tokarek<sup>1</sup>, A. Dziewierz<sup>2</sup>, K. Plens<sup>3</sup>, T. Rakowski<sup>2</sup>, M. Zabojszcz<sup>4</sup>, D. Dudek<sup>1</sup>, Z. Siudak<sup>4</sup>

<sup>1</sup>University Hospital, Department of Cardiology and Cardiovascular Interventions, Krakow, Poland; <sup>2</sup>Jagiellonian University, 2nd Department of Cardiology, Institute of Cardiology, Krakow, Poland; <sup>3</sup>KCRI, Krakow, Poland; <sup>4</sup>The Jan Kochanowski University, Kielce, Poland

**Funding Acknowledgement:** Type of funding source: None

**Introduction:** There are conflicting data on the clinical outcomes of percutaneous coronary intervention (PCI) for ST-segment elevation myocardial infarction (STEMI) based on time of intervention. Concerns have been postulated regarding equally effective in-hospital outcomes for STEMI patients treated with PCI during normal working hours as compared to group treated off-hours.

**Purpose:** The aim of this study was to assess clinical outcomes in “real-world” patients with STEMI treated with PCI during off-hours and regular hours of work.

**Methods:** To avoid possible bias related to the non-randomized design, a propensity score was calculated to compare off- and on-hours groups. The study group consisted of 37, 469 matched pairs in STEMI treated with PCI and stent implantation between 2014 and 2018 during regular hours (weekdays 7:00 AM to 16:59 PM) and off-hours (weekdays between 17:00 PM and 06:59 AM, weekends, and holidays) in 151 tertiary invasive cardiology centers in Poland (the ORPKI Polish National Registry).

**Results:** No differences were reported between both groups in baseline characteristics after the propensity score match (PSM). There were

no differences in time from pain to first contact ( $p=0.2$ ) and door to balloon time between both groups ( $p=0.7$ ). After PSM higher radiation dose was observed in off-hours group (1055.18 ( $\pm 1006.52$ ) vs. 1081.59 ( $\pm 1003.25$ )[mGy];  $p=0.001$ ). However, there was no difference in total amount of contrast (on-hours vs. off-hours: 175.69 ( $\pm 74.71$ ) vs. 176.48 ( $\pm 74.41$ )[ml];  $p=0.1$ , respectively). Similar rate of periprocedural complications was observed between both groups of patients, including stroke, access-site-related bleeding, allergic reaction and coronary artery perforation. However, procedures performed during off-hours were associated with higher incidence of periprocedural death (1.17% (439) vs. 1.49% (559);  $p=0.001$ ) and periprocedural cardiac arrest (1.76% (658) vs. 1.97% (740);  $p=0.001$ ) as compared to PCI conducted within normal working hours.

**Conclusions:** Percutaneous coronary intervention in STEMI performed during off-hours might be associated with higher rate of periprocedural mortality and higher radiation dose as compared to procedures conducted during regular working hours.
